# Supplementary material
Source: bioRxiv or medRxiv preprint supplement (https://www.biorxiv.org/highwire/filestream/11670/field_highwire_adjunct_files/8/040386-9.pdf)
Supplement: Supplementary file [file 040386-9.pdf]

**Table S2.** Zika full variable set preliminary model variable importance

|              | <b>GLM</b> | <b>GBM</b> | <b>GAM</b> | <b>CTA</b> | <b>ANN</b> | <b>SRE</b> | <b>FDA</b> | <b>MARS</b> | <b>RF</b> | <b>MAXENT</b> |
|--------------|------------|------------|------------|------------|------------|------------|------------|-------------|-----------|---------------|
| <b>bio1</b>  | 0.573      | 0.009      | 0.727      | 0          | 0.089      | 0.385      | 0.001      | 0           | 0.022     | 0.294         |
| <b>bio2</b>  | 0.896      | 0.006      | 0.491      | 0          | 0.072      | 0.361      | 0          | 0           | 0.013     | 0.546         |
| <b>bio3</b>  | 0.841      | 0.015      | 0.46       | 0          | 0.14       | 0.286      | 0.056      | 0           | 0.025     | 0.215         |
| <b>bio4</b>  | 1          | 0          | 0.552      | 0          | 0.527      | 0.372      | 0          | 0           | 0.014     | 0.06          |
| <b>bio5</b>  | 0          | 0.003      | 0.659      | 0          | 0.421      | 0.231      | 0          | 0           | 0.014     | 0.487         |
| <b>bio6</b>  | 0.611      | 0.205      | 0          | 0.935      | 0.218      | 0.463      | 0.468      | 0.708       | 0.064     | 0.177         |
| <b>bio7</b>  | 0          | 0.031      | 0.444      | 0          | 0.62       | 0.296      | 0.151      | 0.343       | 0.04      | 0.263         |
| <b>bio8</b>  | 0.219      | 0          | 0.439      | 0          | 0.211      | 0.412      | 0          | 0           | 0.007     | 0             |
| <b>bio9</b>  | 0          | 0.009      | 0.625      | 0          | 0.012      | 0.302      | 0          | 0           | 0.014     | 0             |
| <b>bio10</b> | 1          | 0.002      | 0.698      | 0          | 0.036      | 0.336      | 0          | 0.266       | 0.012     | 0             |
| <b>bio11</b> | 0          | 0.019      | 1          | 0          | 0.155      | 0.378      | 0          | 0           | 0.059     | 0.076         |
| <b>bio12</b> | 0          | 0.019      | 0.191      | 0          | 0.453      | 0.106      | 0.188      | 0.348       | 0.029     | 0.126         |
| <b>bio13</b> | 0          | 0.092      | 0.204      | 0          | 0.759      | 0.211      | 1          | 0.738       | 0.066     | 0.534         |
| <b>bio14</b> | 0.589      | 0.003      | 0.377      | 0.211      | 0.303      | 0.013      | 0.514      | 0.065       | 0.003     | 0.302         |
| <b>bio15</b> | 0          | 0.047      | 0.201      | 0.558      | 0.001      | 0.068      | 0.073      | 0.125       | 0.017     | 0.533         |
| <b>bio16</b> | 0          | 0.009      | 0.18       | 0          | 0.537      | 0.155      | 0.618      | 0.786       | 0.028     | 0.031         |
| <b>bio17</b> | 0.588      | 0.003      | 0.501      | 0          | 0.345      | 0.018      | 0.572      | 0           | 0.008     | 0.464         |
| <b>bio18</b> | 0          | 0.002      | 0.044      | 0          | 0.331      | 0.145      | 0.054      | 0.184       | 0.006     | 0.178         |
| <b>bio19</b> | 0          | 0.008      | 0          | 0          | 0.173      | 0.059      | 0.114      | 0.286       | 0.007     | 0.307         |
| <b>NDVI</b>  | 0          | 0.073      | 0.272      | 0          | 0.025      | 0.27       | 0.043      | 0.204       | 0.048     | 0.624         |

**Table S3.** Dengue full variable set preliminary model variable importance

|              | <b>GLM</b> | <b>GBM</b> | <b>GAM</b> | <b>CTA</b> | <b>ANN</b> | <b>SRE</b> | <b>FDA</b> | <b>MARS</b> | <b>RF</b> | <b>MAXENT</b> |
|--------------|------------|------------|------------|------------|------------|------------|------------|-------------|-----------|---------------|
| <b>bio1</b>  | 0.295      | 0.001      | 0.366      | 0.052      | 0.04       | 0.242      | 0          | 0           | 0.015     | 0.007         |
| <b>bio2</b>  | 0          | 0.035      | 0.136      | 0.202      | 0.016      | 0.1        | 0.078      | 0.004       | 0.044     | 0.048         |
| <b>bio3</b>  | 0.062      | 0          | 0.054      | 0.065      | 0.002      | 0.216      | 0.018      | 0           | 0.016     | 0.05          |
| <b>bio4</b>  | 0.21       | 0.013      | 0.59       | 0.024      | 0.262      | 0.241      | 0          | 0           | 0.03      | 0.013         |
| <b>bio5</b>  | 0.146      | 0          | 0.293      | 0.011      | 0.024      | 0.196      | 0          | 0.029       | 0.008     | 0.008         |
| <b>bio6</b>  | 0.172      | 0.013      | 0.286      | 0.41       | 0.08       | 0.271      | 0.348      | 0.5         | 0.035     | 0.011         |
| <b>bio7</b>  | 0.427      | 0.031      | 0.724      | 0.161      | 0.134      | 0.232      | 0.057      | 0.298       | 0.045     | 0.038         |
| <b>bio8</b>  | 0.203      | 0.01       | 0.152      | 0.041      | 0.017      | 0.262      | 0.004      | 0.315       | 0.015     | 0.023         |
| <b>bio9</b>  | 0.242      | 0          | 0.149      | 0.005      | 0.084      | 0.257      | 0          | 0           | 0.007     | 0.024         |
| <b>bio10</b> | 0.477      | 0          | 0.521      | 0.002      | 0.006      | 0.209      | 0.036      | 0.078       | 0.007     | 0.003         |
| <b>bio11</b> | 0.94       | 0.068      | 0.639      | 0.005      | 0.002      | 0.274      | 0.797      | 0.352       | 0.043     | 0.212         |
| <b>bio12</b> | 0.033      | 0          | 0.095      | 0.024      | 0.059      | 0.124      | 0.141      | 0           | 0.016     | 0.009         |
| <b>bio13</b> | 0.324      | 0.007      | 0.083      | 0.017      | 0.052      | 0.207      | 0.714      | 0.472       | 0.013     | 0.003         |
| <b>bio14</b> | 0.111      | 0.004      | 0.31       | 0.047      | 0.008      | 0.017      | 0.048      | 0.348       | 0.025     | 0.078         |
| <b>bio15</b> | 0.003      | 0.001      | 0.075      | 0.016      | 0.018      | 0.079      | 0.017      | 0           | 0.007     | 0.022         |
| <b>bio16</b> | 0.118      | 0          | 0.113      | 0.015      | 0.208      | 0.16       | 0          | 0.105       | 0.01      | 0.025         |
| <b>bio17</b> | 0.033      | 0.004      | 0.102      | 0.102      | 0.13       | 0.074      | 0          | 0.172       | 0.022     | 0.006         |
| <b>bio18</b> | 0.013      | 0.002      | 0.007      | 0.005      | 0.031      | 0.117      | 0.004      | 0           | 0.017     | 0.015         |
| <b>bio19</b> | 0.012      | 0.018      | 0.035      | 0.048      | 0.052      | 0.079      | 0.056      | 0.029       | 0.024     | 0.073         |
| <b>NDVI</b>  | 0.073      | 0.032      | 0.075      | 0.105      | 0.016      | 0.198      | 0.067      | 0.039       | 0.035     | 0.099         |

**Table S4.** *Aedes aegypti* full variable set preliminary model variable importance

|              | <b>GLM</b> | <b>GBM</b> | <b>GAM</b> | <b>CTA</b> | <b>ANN</b> | <b>SRE</b> | <b>FDA</b> | <b>MARS</b> | <b>RF</b> | <b>MAXENT</b> |
|--------------|------------|------------|------------|------------|------------|------------|------------|-------------|-----------|---------------|
| <b>bio1</b>  | 0.288      | 0.003      | 0.416      | 0.003      | 0.032      | 0.258      | 0.209      | 0           | 0.009     | 0.013         |
| <b>bio2</b>  | 0.111      | 0.011      | 0.029      | 0.242      | 0.023      | 0.165      | 0.023      | 0.003       | 0.054     | 0.017         |
| <b>bio3</b>  | 0.319      | 0.004      | 0.136      | 0.004      | 0.01       | 0.235      | 0.301      | 0.218       | 0.013     | 0.096         |
| <b>bio4</b>  | 0.931      | 0.002      | 0.227      | 0.015      | 0.131      | 0.254      | 0.486      | 0           | 0.014     | 0.052         |
| <b>bio5</b>  | 0.249      | 0          | 0.235      | 0          | 0.066      | 0.251      | 0.298      | 0           | 0.011     | 0.015         |
| <b>bio6</b>  | 0          | 0.001      | 0.056      | 0.026      | 0.017      | 0.256      | 0          | 0           | 0.017     | 0.05          |
| <b>bio7</b>  | 0.644      | 0.011      | 0.123      | 0.052      | 0.155      | 0.249      | 0.048      | 0.078       | 0.036     | 0.026         |
| <b>bio8</b>  | 0.027      | 0.034      | 0.027      | 0.081      | 0.041      | 0.272      | 0.077      | 0.21        | 0.028     | 0.034         |
| <b>bio9</b>  | 0.106      | 0          | 0.028      | 0.033      | 0.073      | 0.249      | 0.021      | 0           | 0.007     | 0.027         |
| <b>bio10</b> | 0.953      | 0          | 0.617      | 0.006      | 0.029      | 0.262      | 0.785      | 0           | 0.01      | 0.016         |
| <b>bio11</b> | 0.221      | 0          | 0.605      | 0.016      | 0.029      | 0.245      | 0          | 0           | 0.011     | 0.05          |
| <b>bio12</b> | 0.008      | 0.001      | 0.004      | 0.049      | 0.173      | 0.248      | 0          | 0.009       | 0.011     | 0.028         |
| <b>bio13</b> | 0.364      | 0.01       | 0.093      | 0.072      | 0.031      | 0.252      | 0.416      | 0.338       | 0.016     | 0.006         |
| <b>bio14</b> | 0.045      | 0.002      | 0.056      | 0.013      | 0.016      | 0.032      | 0.094      | 0.034       | 0.013     | 0.026         |
| <b>bio15</b> | 0.009      | 0          | 0.012      | 0          | 0.073      | 0.106      | 0          | 0           | 0.009     | 0.077         |
| <b>bio16</b> | 0.064      | 0          | 0.05       | 0.007      | 0.099      | 0.251      | 0.057      | 0.035       | 0.016     | 0.006         |
| <b>bio17</b> | 0.033      | 0          | 0.031      | 0.009      | 0.048      | 0.117      | 0.065      | 0           | 0.008     | 0.009         |
| <b>bio18</b> | 0.076      | 0.099      | 0.054      | 0.141      | 0.431      | 0.176      | 0          | 0.006       | 0.04      | 0.23          |
| <b>bio19</b> | 0.006      | 0.003      | 0.009      | 0.059      | 0.03       | 0.145      | 0.015      | 0.012       | 0.014     | 0.016         |
| <b>NDVI</b>  | 0.044      | 0.019      | 0.029      | 0.029      | 0.059      | 0.245      | 0.042      | 0.042       | 0.016     | 0.021         |

**Table S5.** *Aedes africanus* full variable set preliminary model variable importance

|              | <b>GLM</b> | <b>GBM</b> | <b>GAM</b> | <b>CTA</b> | <b>ANN</b> | <b>SRE</b> | <b>FDA</b> | <b>MARS</b> | <b>RF</b> | <b>MAXENT</b> |
|--------------|------------|------------|------------|------------|------------|------------|------------|-------------|-----------|---------------|
| <b>bio1</b>  | 0.437      | 0.003      | 0.56       | 0.245      | 0.141      | 0.305      | 0.231      | 0.085       | 0.005     | 0             |
| <b>bio2</b>  | 0          | 0.006      | 0.54       | 0.217      | 0.051      | 0.055      | 0          | 0           | 0.005     | 0.251         |
| <b>bio3</b>  | 0          | 0.009      | 0.628      | 0          | 0.049      | 0.465      | 0          | 0           | 0.029     | 0.489         |
| <b>bio4</b>  | 0.032      | 0.372      | 0.751      | 0.845      | 0.726      | 0.486      | 0          | 0.56        | 0.04      | 0.42          |
| <b>bio5</b>  | 0          | 0          | 0.564      | 0          | 0.089      | 0.235      | 0          | 0           | 0.002     | 0.065         |
| <b>bio6</b>  | 0          | 0.003      | 0.477      | 0          | 0.137      | 0.317      | 0.09       | 0.368       | 0.015     | 0.132         |
| <b>bio7</b>  | 0          | 0.012      | 0.73       | 0.108      | 0.165      | 0.367      | 0          | 0.406       | 0.012     | 0.253         |
| <b>bio8</b>  | 0          | 0.008      | 0.603      | 0          | 0.186      | 0.336      | 0.126      | 0.402       | 0.01      | 0             |
| <b>bio9</b>  | 0.625      | 0.003      | 0.617      | 0          | 0.108      | 0.311      | 0          | 0.388       | 0.006     | 0             |
| <b>bio10</b> | 0.447      | 0.001      | 0.709      | 0          | 0.133      | 0.252      | 0          | 0.419       | 0.003     | 0.183         |
| <b>bio11</b> | 0          | 0.025      | 0.605      | 0.094      | 0.365      | 0.457      | 0.953      | 0.629       | 0.019     | 0.248         |
| <b>bio12</b> | 0.11       | 0.007      | 0.484      | 0.03       | 0.185      | 0.386      | 0.02       | 0.266       | 0.007     | 0.043         |
| <b>bio13</b> | 0.231      | 0.002      | 0.381      | 0          | 0.344      | 0.399      | 1          | 0.43        | 0.007     | 0.118         |
| <b>bio14</b> | 0.177      | 0.001      | 0.3        | 0          | 0.112      | 0.035      | 0.033      | 0           | 0.004     | 0.35          |
| <b>bio15</b> | 0.243      | 0.001      | 0.349      | 0          | 0.035      | 0.148      | 0          | 0           | 0.003     | 0.128         |
| <b>bio16</b> | 0          | 0.004      | 0.478      | 0          | 0.513      | 0.323      | 0.532      | 0.431       | 0.008     | 0.267         |
| <b>bio17</b> | 0          | 0.002      | 0.074      | 0          | 0.103      | 0.04       | 0          | 0           | 0.005     | 0.117         |
| <b>bio18</b> | 0.28       | 0.011      | 0.307      | 0.186      | 0.186      | 0.23       | 0.085      | 0.099       | 0.007     | 0.397         |
| <b>bio19</b> | 0.293      | 0.124      | 0.446      | 0.485      | 0.861      | 0.035      | 0.673      | 0.248       | 0.052     | 0.44          |
| <b>NDVI</b>  | 0.286      | 0.04       | 0.468      | 0.218      | 0.066      | 0.175      | 0.088      | 0.073       | 0.02      | 0.201         |

**Table S6.** *Aedes albopictus* full variable set preliminary model variable importance

|              | <b>GLM</b> | <b>GBM</b> | <b>GAM</b> | <b>CTA</b> | <b>ANN</b> | <b>SRE</b> | <b>FDA</b> | <b>MARS</b> | <b>RF</b> | <b>MAXENT</b> |
|--------------|------------|------------|------------|------------|------------|------------|------------|-------------|-----------|---------------|
| <b>bio1</b>  | 0.289      | 0          | 0.216      | 0.011      | 0.09       | 0.248      | 0.173      | 0.006       | 0.01      | 0.017         |
| <b>bio2</b>  | 0.06       | 0.017      | 0.048      | 0.031      | 0.031      | 0.249      | 0.025      | 0.018       | 0.082     | 0.012         |
| <b>bio3</b>  | 0.279      | 0.003      | 0.277      | 0.13       | 0          | 0.193      | 0.185      | 0.261       | 0.016     | 0.018         |
| <b>bio4</b>  | 0.528      | 0          | 0.352      | 0.016      | 0.197      | 0.242      | 0          | 0           | 0.015     | 0.008         |
| <b>bio5</b>  | 0.131      | 0          | 0.875      | 0.015      | 0.007      | 0.305      | 0.363      | 0.202       | 0.012     | 0.014         |
| <b>bio6</b>  | 0.262      | 0          | 1          | 0          | 0.334      | 0.237      | 0.626      | 0.136       | 0.017     | 0.019         |
| <b>bio7</b>  | 0.742      | 0.004      | 0.607      | 0.104      | 0.511      | 0.256      | 0.071      | 0.417       | 0.05      | 0.009         |
| <b>bio8</b>  | 0.001      | 0.001      | 0.047      | 0          | 0.03       | 0.275      | 0          | 0           | 0.008     | 0.038         |
| <b>bio9</b>  | 0.007      | 0          | 0.1        | 0          | 0.049      | 0.249      | 0          | 0           | 0.008     | 0.038         |
| <b>bio10</b> | 0.835      | 0.01       | 0.581      | 0          | 0.004      | 0.281      | 0.619      | 0.338       | 0.007     | 0.017         |
| <b>bio11</b> | 0.164      | 0          | 0.292      | 0          | 0.012      | 0.236      | 0.624      | 0.129       | 0.011     | 0.023         |
| <b>bio12</b> | 0.041      | 0.001      | 0.009      | 0.057      | 0.482      | 0.299      | 0          | 0           | 0.011     | 0.015         |
| <b>bio13</b> | 0.207      | 0.001      | 0.274      | 0          | 0.295      | 0.276      | 0          | 0           | 0.01      | 0             |
| <b>bio14</b> | 0.029      | 0.001      | 0.04       | 0.003      | 0.016      | 0.229      | 0.04       | 0.069       | 0.012     | 0.01          |
| <b>bio15</b> | 0.007      | 0          | 0.02       | 0.002      | 0.004      | 0.138      | 0          | 0           | 0.015     | 0.203         |
| <b>bio16</b> | 0          | 0          | 0.051      | 0.006      | 0.013      | 0.278      | 0          | 0           | 0.015     | 0.002         |
| <b>bio17</b> | 0.019      | 0.002      | 0.027      | 0          | 0.037      | 0.243      | 0.046      | 0.039       | 0.006     | 0.022         |
| <b>bio18</b> | 0.147      | 0.474      | 0.075      | 0.377      | 0.315      | 0.287      | 0.44       | 0.122       | 0.114     | 0.066         |
| <b>bio19</b> | 0.003      | 0.005      | 0.011      | 0          | 0.012      | 0.213      | 0.013      | 0.008       | 0.013     | 0.019         |
| <b>NDVI</b>  | 0.027      | 0.009      | 0.021      | 0.024      | 0.008      | 0.26       | 0.026      | 0.032       | 0.008     | 0.006         |

**Table S7.** AUC of ten models for five species (with reduced variable sets). Bolded models were shown in the final models.

|        | GLM          | GBM          | GAM          | CTA          | ANN          | SRE   | FDA          | MARS         | RF           | MAXENT       |
|--------|--------------|--------------|--------------|--------------|--------------|-------|--------------|--------------|--------------|--------------|
| A.Aeg  | <b>0.975</b> | <b>0.980</b> | <b>0.981</b> | <b>0.977</b> | <b>0.957</b> | 0.855 | <b>0.974</b> | <b>0.976</b> | <b>1.000</b> | 0.930        |
| A.Afr  | <b>0.983</b> | <b>0.999</b> | <b>1.000</b> | <b>0.985</b> | <b>0.967</b> | 0.837 | <b>0.959</b> | <b>0.979</b> | <b>1.000</b> | 0.739        |
| A.Alb* | <b>0.919</b> | <b>0.942</b> | <b>0.938</b> | <b>0.945</b> | 0.882        | 0.760 | <b>0.923</b> | <b>0.930</b> | <b>1.000</b> | <b>0.940</b> |
| ZIKV   | <b>0.934</b> | <b>0.975</b> | <b>0.968</b> | <b>0.920</b> | 0.773        | 0.741 | <b>0.934</b> | <b>0.938</b> | <b>1.000</b> | 0.807        |
| DENG*  | <b>0.919</b> | <b>0.942</b> | <b>0.938</b> | <b>0.945</b> | 0.882        | 0.760 | <b>0.923</b> | <b>0.930</b> | <b>1.000</b> | <b>0.940</b> |

**Table S8.** Zika final model variable importances

|              | <b>GLM</b> | <b>GBM</b> | <b>GAM</b> | <b>CTA</b> | <b>FDA</b> | <b>MARS</b> | <b>RF</b> |
|--------------|------------|------------|------------|------------|------------|-------------|-----------|
| <b>bio1</b>  | 0.608      | 0.014      | 0.654      | 0          | 0          | 0           | 0.026     |
| <b>bio2</b>  | 0.919      | 0.006      | 0.738      | 0.068      | 0          | 0           | 0.019     |
| <b>bio3</b>  | 0.774      | 0.02       | 0.481      | 0.178      | 0.1        | 0           | 0.029     |
| <b>bio4</b>  | 1          | 0          | 0.329      | 0          | 0          | 0           | 0.017     |
| <b>bio5</b>  | 0          | 0.006      | 0.708      | 0          | 0          | 0.279       | 0.015     |
| <b>bio6</b>  | 0.626      | 0.211      | 0          | 0.879      | 0.46       | 0.803       | 0.125     |
| <b>bio7</b>  | 0          | 0.033      | 0.563      | 0          | 0.268      | 0.354       | 0.051     |
| <b>bio10</b> | 1          | 0.003      | 0.792      | 0          | 0          | 0           | 0.014     |
| <b>bio11</b> | 0          | 0.018      | 1          | 0          | 0          | 0.033       | 0.047     |
| <b>bio12</b> | 0          | 0.022      | 0.104      | 0          | 0.227      | 0           | 0.028     |
| <b>bio13</b> | 0          | 0.109      | 0.075      | 0          | 0.462      | 0.873       | 0.116     |
| <b>bio15</b> | 0          | 0.046      | 0.207      | 0.323      | 0.071      | 0.295       | 0.026     |
| <b>bio16</b> | 0          | 0.01       | 0          | 0          | 0.153      | 0.506       | 0.043     |
| <b>bio17</b> | 0.258      | 0.008      | 0.183      | 0.094      | 0.208      | 0.211       | 0.013     |
| <b>bio19</b> | 0          | 0.01       | 0.02       | 0.201      | 0.062      | 0.326       | 0.008     |
| <b>NDVI</b>  | 0          | 0.082      | 0.266      | 0          | 0.095      | 0.027       | 0.06      |

**Table S9.** Dengue final model variable importances

|              | <b>GLM</b> | <b>GBM</b> | <b>GAM</b> | <b>CTA</b> | <b>FDA</b> | <b>MARS</b> | <b>RF</b> | <b>MAXENT</b> |
|--------------|------------|------------|------------|------------|------------|-------------|-----------|---------------|
| <b>bio1</b>  | 0.388      | 0.001      | 0.363      | 0.004      | 0.248      | 0           | 0.017     | 0             |
| <b>bio2</b>  | 0.004      | 0.029      | 0.054      | 0.097      | 0          | 0           | 0.053     | 0.021         |
| <b>bio4</b>  | 0.159      | 0.012      | 0.241      | 0.076      | 0          | 0.233       | 0.06      | 0.031         |
| <b>bio6</b>  | 0.236      | 0.008      | 0.213      | 0          | 0.266      | 0           | 0.045     | 0.017         |
| <b>bio7</b>  | 0.702      | 0.036      | 0.571      | 0.328      | 0.639      | 0.406       | 0.073     | 0.043         |
| <b>bio8</b>  | 0.225      | 0.009      | 0.083      | 0.055      | 0.006      | 0.235       | 0.021     | 0.084         |
| <b>bio9</b>  | 0.272      | 0          | 0.063      | 0.008      | 0          | 0.186       | 0.012     | 0.029         |
| <b>bio10</b> | 0.427      | 0          | 0.502      | 0.033      | 0.508      | 0.051       | 0.015     | 0.071         |
| <b>bio11</b> | 1          | 0.109      | 0.818      | 0.527      | 0.85       | 0.158       | 0.062     | 0.487         |
| <b>bio13</b> | 0.012      | 0.008      | 0.138      | 0.098      | 0.072      | 0.104       | 0.02      | 0.001         |
| <b>bio14</b> | 0.032      | 0.009      | 0.082      | 0.147      | 0.022      | 0.028       | 0.034     | 0.03          |
| <b>bio15</b> | 0          | 0.001      | 0.031      | 0.028      | 0          | 0           | 0.011     | 0.03          |
| <b>bio16</b> | 0          | 0          | 0.075      | 0.005      | 0          | 0           | 0.016     | 0.007         |
| <b>bio18</b> | 0.005      | 0.002      | 0.004      | 0.011      | 0          | 0           | 0.025     | 0.001         |
| <b>bio19</b> | 0.032      | 0.026      | 0.055      | 0.064      | 0.069      | 0.052       | 0.048     | 0.074         |
| <b>NDVI</b>  | 0.095      | 0.042      | 0.085      | 0.17       | 0.081      | 0.113       | 0.05      | 0.052         |



**Table S10.** *Aedes aegypti* final model variable importances

|              | <b>GLM</b> | <b>GBM</b> | <b>GAM</b> | <b>CTA</b> | <b>ANN</b> | <b>FDA</b> | <b>MARS</b> | <b>RF</b> |
|--------------|------------|------------|------------|------------|------------|------------|-------------|-----------|
| <b>bio1</b>  | 0.276      | 0.01       | 0.462      | 0.012      | 0.019      | 0.212      | 0.024       | 0.02      |
| <b>bio2</b>  | 0.13       | 0.011      | 0.05       | 0.234      | 0.023      | 0          | 0           | 0.083     |
| <b>bio3</b>  | 0.372      | 0.005      | 0.148      | 0.048      | 0.008      | 0.102      | 0.078       | 0.018     |
| <b>bio4</b>  | 0.82       | 0.001      | 0.198      | 0.026      | 0.048      | 0          | 0           | 0.02      |
| <b>bio5</b>  | 0.273      | 0          | 0.178      | 0.012      | 0.064      | 0.215      | 0           | 0.016     |
| <b>bio7</b>  | 0.755      | 0.019      | 0.328      | 0.056      | 0.057      | 0.071      | 0.23        | 0.048     |
| <b>bio9</b>  | 0.068      | 0          | 0.016      | 0.039      | 0.051      | 0          | 0.008       | 0.01      |
| <b>bio10</b> | 0.94       | 0.018      | 0.611      | 0.061      | 0.017      | 0.716      | 0.306       | 0.029     |
| <b>bio11</b> | 0.472      | 0.001      | 0.621      | 0.092      | 0.169      | 0.752      | 0.015       | 0.022     |
| <b>bio13</b> | 0.345      | 0.012      | 0.06       | 0.076      | 0.077      | 0.753      | 0.108       | 0.031     |
| <b>bio14</b> | 0.013      | 0.004      | 0.023      | 0.007      | 0.02       | 0.019      | 0.008       | 0.018     |
| <b>bio15</b> | 0.005      | 0          | 0.014      | 0.003      | 0.032      | 0          | 0           | 0.013     |
| <b>bio16</b> | 0.081      | 0          | 0.033      | 0.009      | 0.088      | 0.11       | 0.051       | 0.024     |
| <b>bio18</b> | 0.086      | 0.14       | 0.085      | 0.159      | 0.661      | 0.039      | 0.352       | 0.065     |
| <b>bio19</b> | 0.009      | 0.004      | 0.011      | 0.043      | 0.026      | 0.025      | 0.015       | 0.018     |
| <b>NDVI</b>  | 0.051      | 0.02       | 0.031      | 0.034      | 0.029      | 0.052      | 0.042       | 0.021     |

**Table S11.** *Aedes africanus* final model variable importances

|              | <b>GLM</b> | <b>GBM</b> | <b>GAM</b> | <b>CTA</b> | <b>ANN</b> | <b>FDA</b> | <b>MARS</b> | <b>RF</b> |
|--------------|------------|------------|------------|------------|------------|------------|-------------|-----------|
| <b>bio1</b>  | 0.562      | 0          | 0.696      | 0          | 0.112      | 0.518      | 0.062       | 0.004     |
| <b>bio2</b>  | 0.184      | 0.005      | 0.1        | 0.078      | 0.165      | 0          | 0           | 0.007     |
| <b>bio3</b>  | 0.418      | 0.005      | 0.511      | 0.138      | 0.01       | 0.041      | 0           | 0.027     |
| <b>bio4</b>  | 0.999      | 0.423      | 0.324      | 0.717      | 0.884      | 0.269      | 0.548       | 0.041     |
| <b>bio7</b>  | 0.41       | 0.005      | 0.311      | 0.101      | 0.349      | 0          | 0.018       | 0.017     |
| <b>bio8</b>  | 0          | 0.013      | 0.564      | 0.229      | 0.451      | 0.014      | 0.361       | 0.012     |
| <b>bio9</b>  | 0.545      | 0.002      | 0.582      | 0          | 0.392      | 0          | 0.396       | 0.007     |
| <b>bio10</b> | 0.69       | 0.003      | 0.584      | 0.141      | 0.132      | 0          | 0.219       | 0.009     |
| <b>bio11</b> | 0          | 0.01       | 0.571      | 0.276      | 0.355      | 0.972      | 0           | 0.01      |
| <b>bio13</b> | 0.688      | 0.025      | 0.747      | 0.18       | 0.912      | 0.871      | 0.445       | 0.024     |
| <b>bio14</b> | 0.301      | 0.002      | 0.265      | 0.013      | 0.216      | 0.071      | 0           | 0.004     |
| <b>bio15</b> | 0.391      | 0.001      | 0.396      | 0.038      | 0.293      | 0          | 0           | 0.005     |
| <b>bio16</b> | 0.136      | 0.006      | 0.398      | 0.033      | 0.433      | 0.356      | 0.189       | 0.017     |
| <b>bio18</b> | 0.162      | 0.01       | 0.331      | 0.021      | 0.226      | 0.069      | 0.069       | 0.009     |
| <b>bio19</b> | 0.11       | 0.127      | 0.517      | 0.246      | 0.541      | 0.733      | 0.421       | 0.047     |
| <b>NDVI</b>  | 0.239      | 0.065      | 0.297      | 0          | 0.291      | 0.176      | 0.21        | 0.028     |

**Table S12.** *Aedes albopictus* final model variable importances

|              | <b>GLM</b> | <b>GBM</b> | <b>GAM</b> | <b>CTA</b> | <b>FDA</b> | <b>MARS</b> | <b>RF</b> | <b>MAXENT</b> |
|--------------|------------|------------|------------|------------|------------|-------------|-----------|---------------|
| <b>bio1</b>  | 0.35       | 0          | 0.357      | 0          | 0.196      | 0.198       | 0.01      | 0.143         |
| <b>bio2</b>  | 0.058      | 0.032      | 0.001      | 0.233      | 0.003      | 0.018       | 0.105     | 0.094         |
| <b>bio3</b>  | 0.297      | 0.003      | 0.069      | 0.055      | 0.103      | 0.189       | 0.027     | 0.066         |
| <b>bio4</b>  | 0.416      | 0          | 0.312      | 0          | 0.025      | 0.141       | 0.023     | 0.005         |
| <b>bio5</b>  | 0.569      | 0          | 0.41       | 0          | 0.286      | 0.311       | 0.026     | 0.019         |
| <b>bio6</b>  | 1          | 0          | 0.45       | 0          | 0.041      | 0.355       | 0.023     | 0.001         |
| <b>bio7</b>  | 0.29       | 0.006      | 0.181      | 0          | 0          | 0           | 0.083     | 0.003         |
| <b>bio10</b> | 0.761      | 0.011      | 0.61       | 0.01       | 0.646      | 0.36        | 0.012     | 0.122         |
| <b>bio11</b> | 0.5        | 0          | 0.243      | 0.007      | 0.313      | 0.281       | 0.013     | 0             |
| <b>bio12</b> | 0.046      | 0.002      | 0.017      | 0          | 0          | 0           | 0.014     | 0.007         |
| <b>bio13</b> | 0.226      | 0.001      | 0.055      | 0          | 0          | 0           | 0.022     | 0.16          |
| <b>bio14</b> | 0.017      | 0.002      | 0.012      | 0          | 0.008      | 0.023       | 0.021     | 0.028         |
| <b>bio15</b> | 0.003      | 0.001      | 0.001      | 0.009      | 0          | 0.009       | 0.016     | 0.004         |
| <b>bio18</b> | 0.105      | 0.462      | 0.07       | 0.643      | 0.357      | 0.113       | 0.154     | 0.057         |
| <b>bio19</b> | 0.002      | 0.005      | 0.009      | 0          | 0.009      | 0           | 0.021     | 0.021         |
| <b>NDVI</b>  | 0.026      | 0.007      | 0.079      | 0.002      | 0.022      | 0.015       | 0.009     | 0.058         |
